# Supplementary material
Source: publisher figshare collection journal article supplement (https://acs.figshare.com/ndownloader/files/5790210)
Supplement: Supplementary file 1 [file 5790210]

## Supporting Information

### A Short and Efficient Synthesis of Crocetin-dimethylester and Crocetinindial

*Daniel Frederico, Paulo Marcos Donate\*, Mauricio Gomes Constantino, Erika Soares Bronze, and Mirela I. Sairre*

Departamento de Química, Faculdade de Filosofia, Ciências e Letras de Ribeirão Preto,

Universidade de São Paulo, 14040-901 - Ribeirão Preto, SP, Brazil

[pmdonate@usp.br](mailto:pmdonate@usp.br)

General experimental methods (S2), characterization data for compounds **1**, **2**, and **5** (S3),

characterization data for compounds **7**, and **8** (S4).

All  $^1\text{H}$  and  $^{13}\text{C}$  NMR spectra were recorded at 400 and 100 MHz, respectively, using deuterated chloroform ( $\text{CDCl}_3$ ) as solvent; chemical shifts are in ppm downfield from a tetramethylsilane internal standard. IR spectra were measured with a IFTIR spectrometer, and the most intense or representative bands are reported (in  $\text{cm}^{-1}$ ). Mass spectra were determined at an ionizing voltage of 70 eV, using a fused silica capillary GC columns: HP-1 (25 m length x 0.2 mm i.d. x 0.33  $\mu\text{m}$  phase thickness) or HP-5 (25 m length x 0.32 mm i.d. x 0.52  $\mu\text{m}$  phase thickness). The column temperature was 100  $^\circ\text{C}$  (3 min) ramped to 220  $^\circ\text{C}$  at 20  $^\circ\text{C min}^{-1}$ . The mass spectra of compound **1** were performed by electrospray ionization (ESI), using a LC/MS spectrometer. Solutions were infused into the Z-spray source at 10  $\mu\text{l.min}^{-1}$  (0.5  $\text{mg.mL}^{-1}$ ) and the protonated parent ion was observed at 357. TLC was performed on plates precoated with silica gel 60 F<sub>254</sub> (0.25 mm thick) and column chromatographies were performed with silica gel 60 (70-230 mesh). Except where specified, all reagents were purchased from commercial sources and were used without further purification. Melting points are uncorrected.

**Dimethyl (2E,4E,6E,8E,10E,12E,14E)-2,6,11,15-tetramethylhexadeca-2,4,6,8,10,12,14-heptaene-1,16-dioate (1):** brick-red solid (mp = 215-218°C, literature:<sup>6a</sup> 222°C): IR (KBr)  $\nu_{\max}$  1715, 1618, 1430, 1285, and 1170  $\text{cm}^{-1}$ ;  $^1\text{H}$  NMR (400 MHz,  $\text{CDCl}_3$ )  $\delta$  7.30 (dd,  $J_1 = 1.3$  Hz,  $J_2 = 10.6$  Hz, 2H), 6.72 (m, 2H), 6.63 (d,  $J = 15.0$  Hz, 2H), 6.55 (dd,  $J_1 = 10.3$  Hz,  $J_2 = 15.0$  Hz, 2H), 6.36 (dd,  $J_1 = 1.3$  Hz,  $J_2 = 8.1$  Hz, 2H), 3.77 (s, 6H), 2.01 (d,  $J = 1.3$  Hz, 6H), and 1.99 (d,  $J = 1.3$  Hz, 6H);  $^{13}\text{C}$  NMR (100 MHz,  $\text{CDCl}_3$ )  $\delta$  168.9 (C=O), 143.7 (CH), 138.8 (CH), 136.7 (C), 135.3 (CH), 131.3 (CH), 126.4 (C), 123.8 (CH), 51.8 ( $\text{OCH}_3$ ), 12.8 ( $\text{CH}_3$ ), and 12.7 ( $\text{CH}_3$ ); MS  $m/z$  quasi ion  $[\text{M} + \text{H}]^+$  in 357.

**(2E,4E,6E,8E,10E,12E,14E)-2,6,11,15-Tetramethylhexadeca-2,4,6,8,10,12,14-heptaene-1,16-dial (2):** red solid (mp = 198-200°C, literature:<sup>6d</sup> 190-191°C): IR (KBr)  $\nu_{\max}$  1671, 1611, 1573, 1378, and 1010  $\text{cm}^{-1}$ ;  $^1\text{H}$  NMR (400 MHz,  $\text{CDCl}_3$ )  $\delta$  9.47 (s, 2H), 6.94 (m, 2H), 6.77 (dd,  $J_1 = 3.0$  Hz,  $J_2 = 7.8$  Hz, 2H), 6.73 (m, 4H), 6.46 (m, 2H), 2.04 (br s, 6H), and 1.91 (d,  $J = 1.0$  Hz, 6H);  $^{13}\text{C}$  NMR (100 MHz,  $\text{CDCl}_3$ )  $\delta$  194.9(C=O), 149.2 (CH), 145.8 (CH), 137.7 (C), 137.4 (C), 137.1 (CH), 132.3 (CH), 124.0 (CH), 13.2 ( $\text{CH}_3$ ), and 10.0 ( $\text{CH}_3$ ); MS  $m/z$  (relative intensity) 296 ( $\text{M}^+$ , 28.09), 128 (27.25), 91 (97.37), 53 (37.90), and 18 (100.00).

**(2E)-1,1,4,4-Tetramethoxybut-2-ene (5):** colorless oil: IR (film)  $\nu_{\max}$  2917, 1696, 1446, 1353, 1115, and 1060  $\text{cm}^{-1}$ ;  $^1\text{H}$  NMR (400 MHz,  $\text{CDCl}_3$ )  $\delta$  5.4 (m, 2H), 4.7 (br s, 2H), and 3.1 (s, 12H);  $^{13}\text{C}$  NMR (100 MHz,  $\text{CDCl}_3$ )  $\delta$  132.5 (=CH), 101.6 (CH), and 53.8 ( $\text{OCH}_3$ ); MS  $m/z$  (relative intensity) 145 ( $\text{M}^+ - 31$ , 8.78), 101 (6.80), 75 (100.00), and 31 (7.14).

**Dimethyl (2E,4E,6E)-2,7-dimethylocta-2,4,6-triene-1,8-dioate (7):** white solid (mp = 142-144°C, literature:<sup>15</sup> 139-140°C) IR (KBr)  $\nu_{\max}$  1709, 1620, 1438, 1294, 1238, 1162, 1111, and 755  $\text{cm}^{-1}$ ;  $^1\text{H}$  NMR (400 MHz,  $\text{CDCl}_3$ )  $\delta$  7.2 (ddq,  $J_1 = J_2 = J_3 = 1.3$  Hz,  $J_4 = 3.0$  Hz,  $J_5 = 8.0$  Hz, 2H), 6.7 (m, 2H), 3.7 (s, 6H), and 1.9 (d,  $J = 1.3$  Hz, 6H);  $^{13}\text{C}$  NMR (100 MHz,  $\text{CDCl}_3$ )  $\delta$  168.8 (C=O), 137.4 (CH), 134.0 (CH), 130.3 (C), 52.4 ( $\text{OCH}_3$ ), and 13.3 ( $\text{CH}_3$ ); MS  $m/z$  (relative intensity) 224 ( $\text{M}^+$ , 5.49), 149 (4.04), 105 (12.52), 59 (11.78), and 28 (100.00).

**(2E,4E,6E)-2,6-Dimethylocta-2,4,6-triene-1,8-diol (8):** white solid (mp = 92-95°C, literature:<sup>18</sup> 94-96°C): IR (KBr)  $\nu_{\max}$  3480, 1610, 1430, and 1257  $\text{cm}^{-1}$ ;  $^1\text{H}$  NMR (400 MHz,  $\text{CDCl}_3$ )  $\delta$  6.45 (m, 2H), 6.16 (ddq,  $J_1 = J_2 = J_3 = 1.6$  Hz,  $J_4 = 2.5$  Hz,  $J_5 = 7.7$  Hz, 2H), 4.10 (br s, 4H), 1.81 (d,  $J = 1.6$  Hz, 6H), and 1.64 (br s, 2H);  $^{13}\text{C}$  NMR (100 MHz,  $\text{CDCl}_3$ )  $\delta$  137.4 (C), 128.3 (CH), 125.2 (CH), 68.5 ( $\text{CH}_2$ ), and 14.2 ( $\text{CH}_3$ ); MS  $m/z$  (relative intensity) 84 ( $\text{M}^+ - 84$ , 1.01), 43 (11.66), 32 (32.43), 28 (100.00), 18 (4.90), and 14 (19.21).
